RETRACTION

## Retraction: Green synthesis of SiO<sub>2</sub> nanoparticles from *Rhus coriaria* L. extract: Comparison with chemically synthesized SiO<sub>2</sub> nanoparticles

The *PLOS One* Editors

Following the publication of this article [1], concerns were raised about Figs 6 and 7, as well as about the availability of the underlying data. Specifically:

- Fig 6A appears highly similar to the right panel of Fig 4 in [2], which was published in 2017 by different authors.
- There is a mismatch between the reported electron microscope in the Methods sections (Quanta 450) and the banners in Fig 6 (MIRA3 TESCAN).
- In Fig 7B, two regions with a highly similar pixelation pattern were noted.
- The underlying data supporting the study results reported in [1] are not available. At the time of submission, *PLOS One* policy required authors to make the underlying data available with the article.

The comments and data provided by the authors in response to the above-mentioned issues did not resolve the concerns about the published results.

In light of the above unresolved concerns that question the reliability and integrity of these results, the *PLOS One* Editors retract this article [1].

ASM did not agree with the retraction. CYR, AAB, and SMH either did not respond directly or could not be reached.

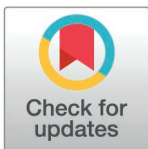

### References

1. Rahimzadeh CY, Barzinjy AA, Mohammed AS, Hamad SM. RETRACTED: Green synthesis of SiO<sub>2</sub> nanoparticles from *Rhus coriaria* L. extract: Comparison with chemically synthesized SiO<sub>2</sub> nanoparticles. *PLoS One*. 2022;17(8):e0268184. <https://doi.org/10.1371/journal.pone.0268184> PMID: 35930607
2. Mohamad IS, Ismail SS, Norizan MN, Murad SAZ, Abdullah MMA. ZnO Photoanode Effect on the Efficiency Performance of Organic Based Dye Sensitized Solar Cell. *IOP Conference Series: Materials Science and Engineering*. 2017;209:012028. <https://doi.org/10.1088/1757-899x/209/1/012028>

### OPEN ACCESS

Citation: The *PLOS One* Editors (2026) Retraction: Green synthesis of SiO<sub>2</sub> nanoparticles from *Rhus coriaria* L. extract: Comparison with chemically synthesized SiO<sub>2</sub> nanoparticles. *PLoS One* 21(4): e0346847. <https://doi.org/10.1371/journal.pone.0346847>

Published: April 9, 2026

**Copyright:** © 2026 The *PLOS One* Editors. This is an open access article distributed under the terms of the [Creative Commons Attribution License](https://creativecommons.org/licenses/by/4.0/), which permits unrestricted use, distribution, and reproduction in any medium, provided the original author and source are credited.
